CORRECTION

# Correction: BMI and WHR Are Reflected in Female Facial Shape and Texture: A Geometric Morphometric Image Analysis

The *PLOS ONE* Journal Staff

The following information is missing from the Funding section: This study was supported by the Faculty of Life Sciences, University of Vienna (Emerging field "Comparative Human Life History: A Multilevel Approach"; IP 547012) to PM and KS, and the Austrian Science Fund (FWF P29397) to PM and SW.

In the Author Contributions section, all four authors should be listed as contributing to the methodology (CM SW KS PM).

The publisher apologizes for these errors.

## Reference

1. Mayer C, Windhager S, Schaefer K, Mitteroecker P (2017) BMI and WHR Are Reflected in Female Facial Shape and Texture: A Geometric Morphometric Image Analysis. *PLoS ONE* 12(1): e0169336. doi:[10.1371/journal.pone.0169336](https://doi.org/10.1371/journal.pone.0169336) PMID: [28052103](https://pubmed.ncbi.nlm.nih.gov/28052103/)

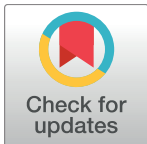

## OPEN ACCESS

**Citation:** The *PLOS ONE* Journal Staff (2017) Correction: BMI and WHR Are Reflected in Female Facial Shape and Texture: A Geometric Morphometric Image Analysis. *PLoS ONE* 12(2): e0172205. doi:[10.1371/journal.pone.0172205](https://doi.org/10.1371/journal.pone.0172205)

**Published:** February 9, 2017

**Copyright:** © 2017 The PLOS ONE Journal Staff. This is an open access article distributed under the terms of the [Creative Commons Attribution License](https://creativecommons.org/licenses/by/4.0/), which permits unrestricted use, distribution, and reproduction in any medium, provided the original author and source are credited.
